# Supplementary material for: The application of chiroptical spectroscopy (circular dichroism) in quantifying binding events in lanthanide directed synthesis of chiral luminescent self-assembly structures
Source: PubMed Central journal article supplement (PMC5588118; doi:10.1039/c4sc02474e), 2014-10-10

## The application of chiroptical spectroscopy (circular dichroism) in quantifying binding events in lanthanide directed synthesis of chiral luminescent self-assembly structures

Oxana Kotova,<sup>a\*</sup> Salvador Blasco,<sup>a</sup> Brendan Twamley,<sup>a</sup> John O'Brien,<sup>a</sup>  
Robert D. Peacock,<sup>b</sup> Jonathan A. Kitchen,<sup>a,c</sup> Miguel Martinez-Calvo<sup>a</sup> and Thorfinnur Gunnlaugsson<sup>a\*</sup>

**Scheme S1.** Schematic representation of the ligands **1(S)**, **1(R)** and **5(S)**, **5(R)** along with their corresponding Eu(III) complexes.

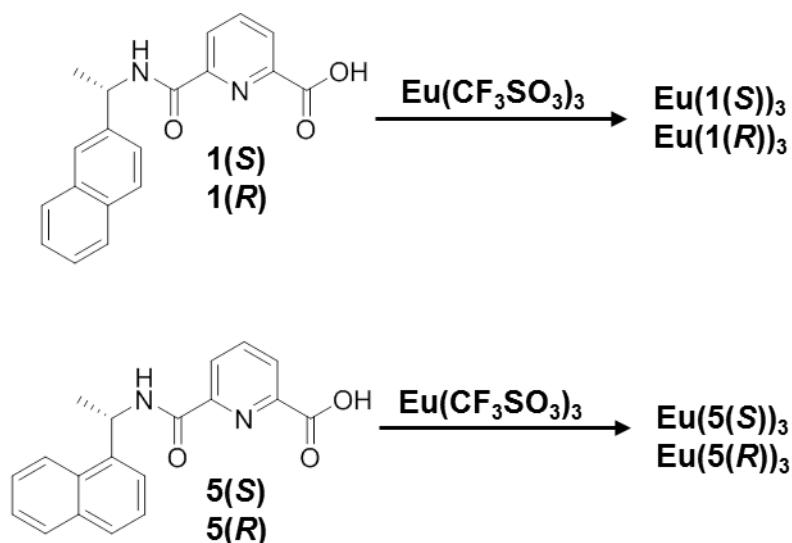

**Figure S1.**  $^1\text{H}$  NMR of **2** (400 MHz,  $\text{CDCl}_3$ ).

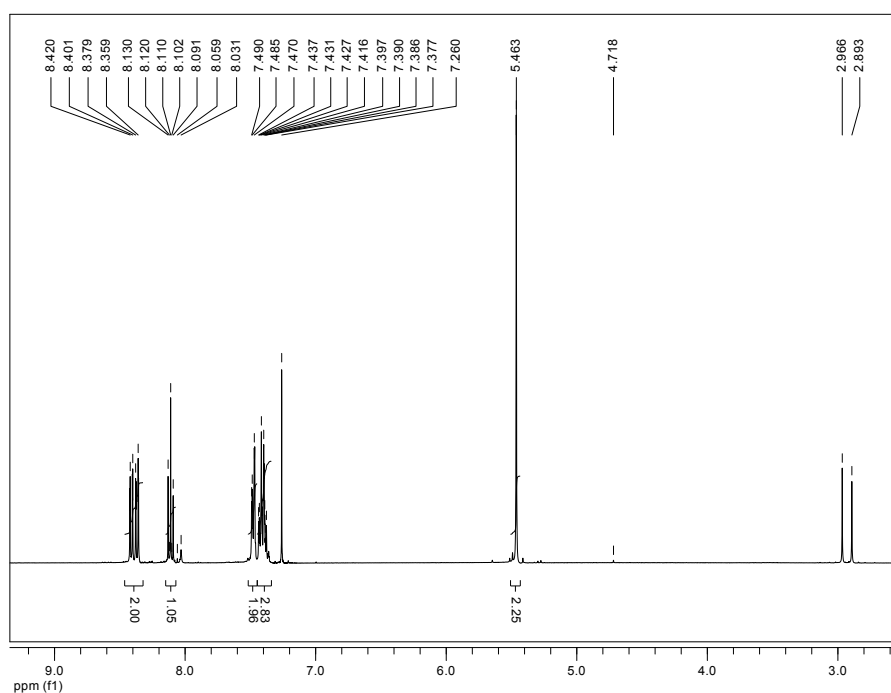

**Figure S2.**  $^{13}\text{C}$  NMR of **2** (100 MHz,  $\text{CDCl}_3$ ).

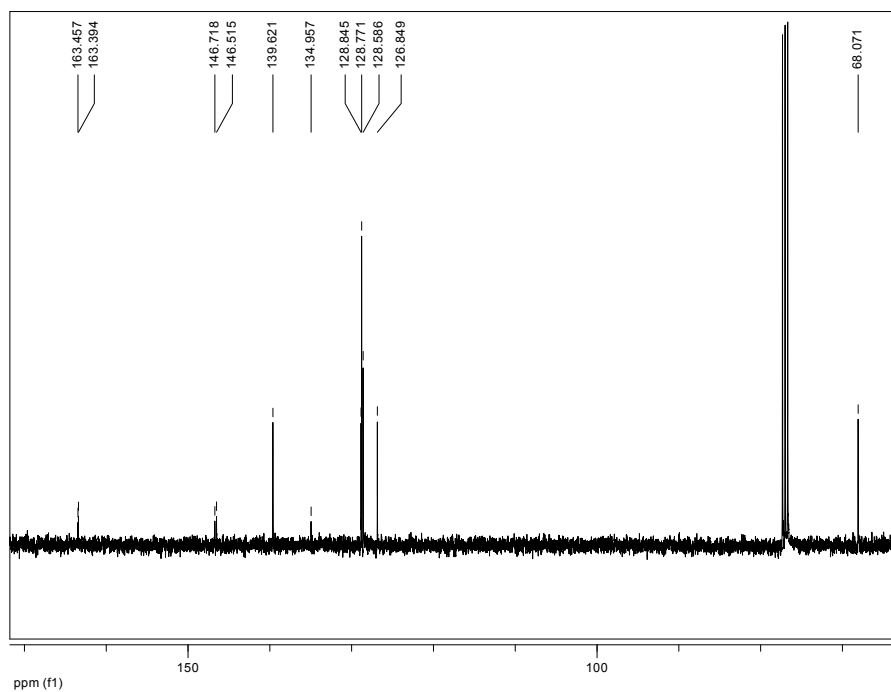

**Figure S3.**  $^1\text{H}$  NMR of **4(S)** (400 MHz,  $\text{CDCl}_3$ ).

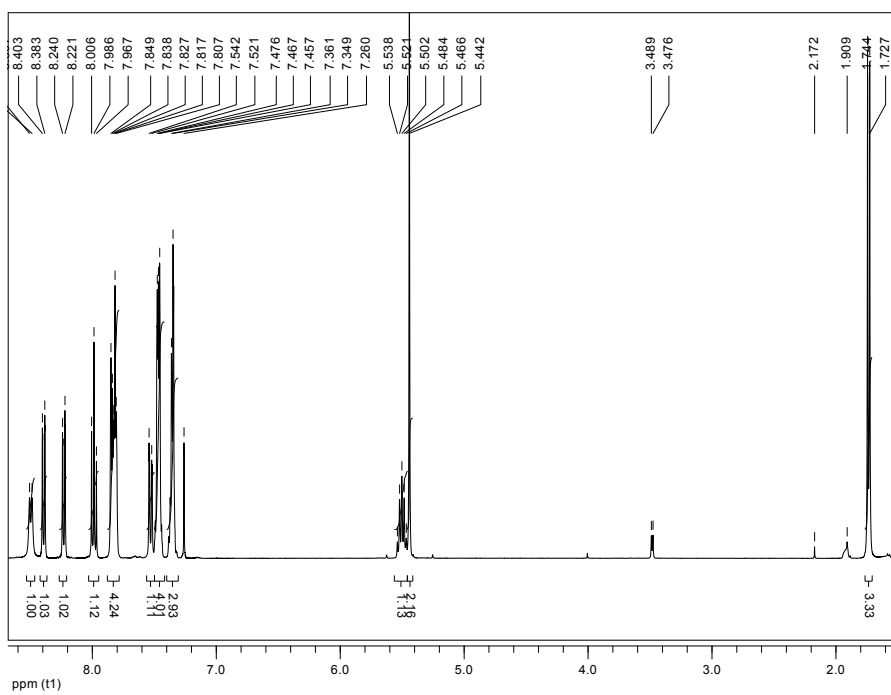

Figure S4.  $^{13}\text{C}$  NMR of **4(S)** (100 MHz,  $\text{CDCl}_3$ ).

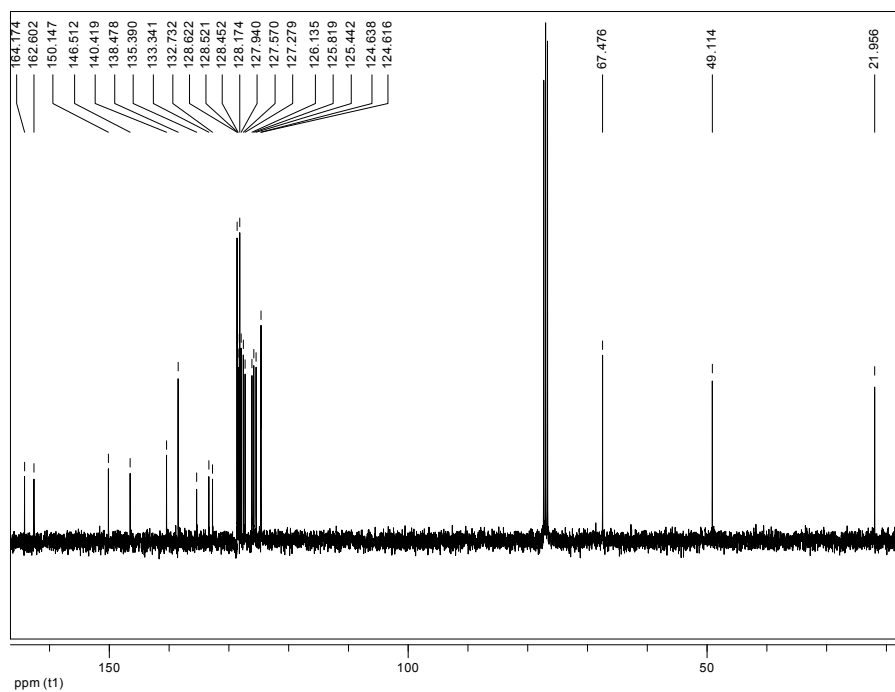

Figure S5.  $^1\text{H}$  NMR of **4(R)** (400 MHz,  $\text{CDCl}_3$ ).

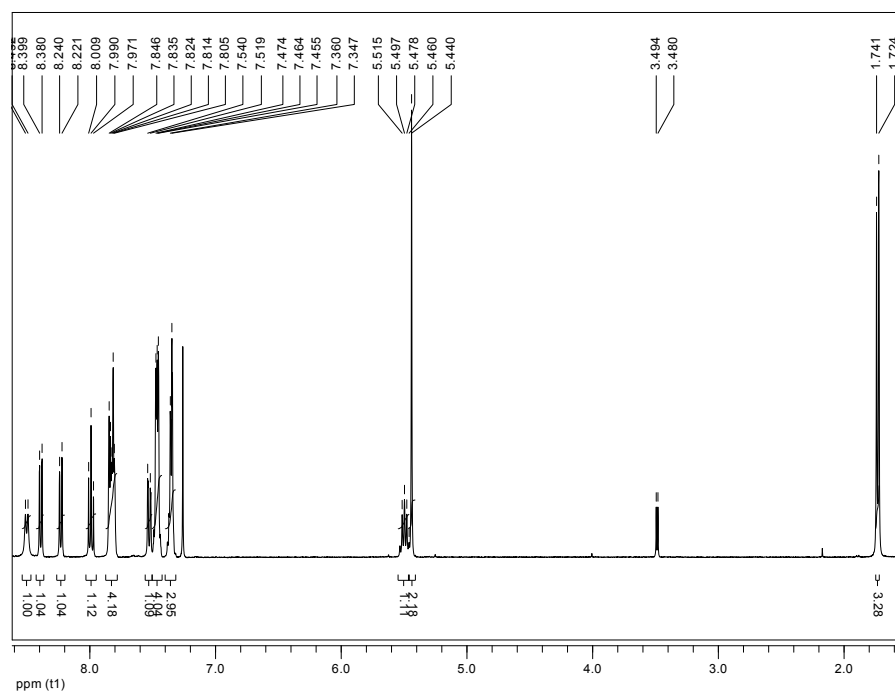

Figure S6.  $^{13}\text{C}$  NMR of **4(R)** (100 MHz,  $\text{CDCl}_3$ ).

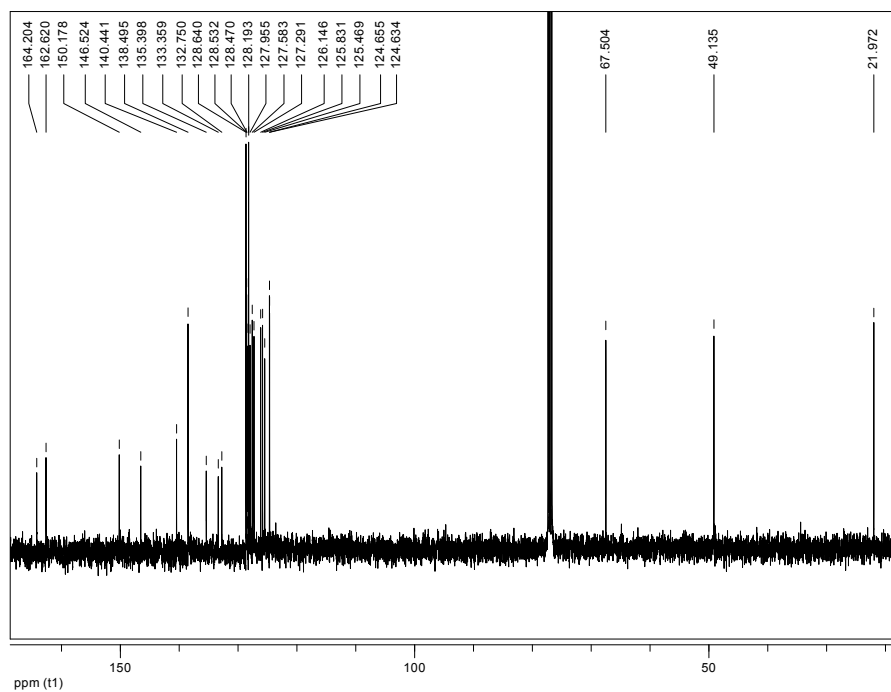

Figure S7.  $^1\text{H}$  NMR of **1(R)** (600 MHz,  $\text{CD}_3\text{OD}$ ).

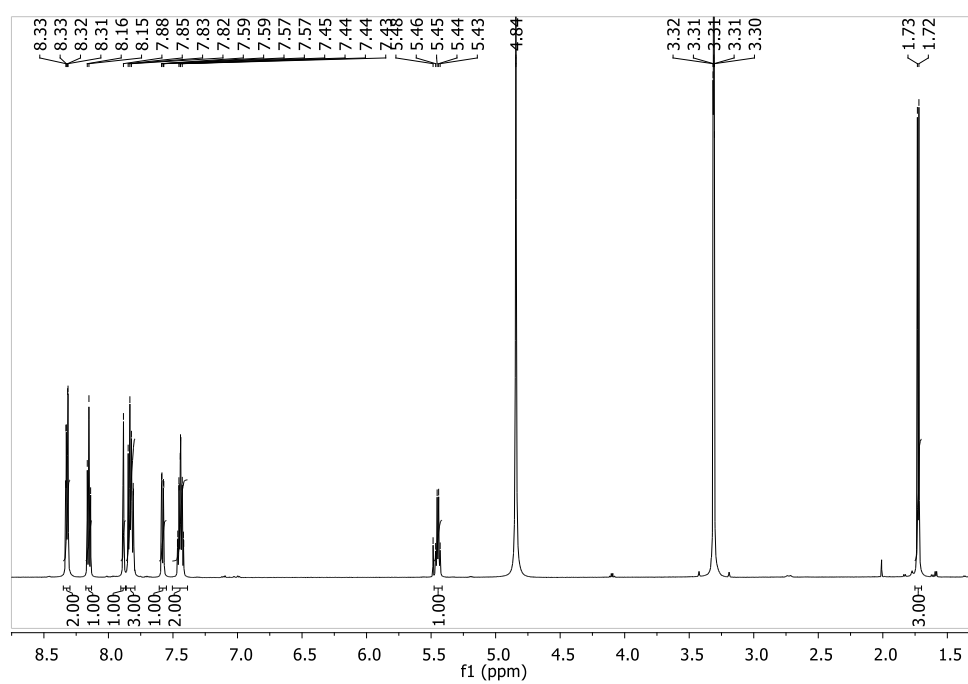

**Figure S8.**  $^{13}\text{C}$  NMR of **1(R)** (150 MHz,  $\text{CD}_3\text{OD}$ ).

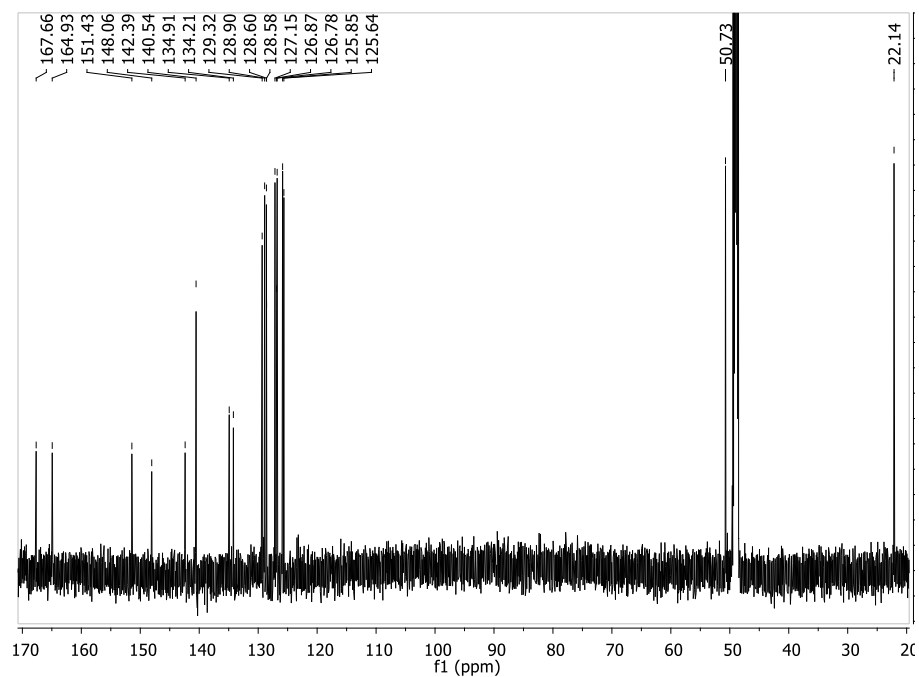

**Figure S9.**  $^{13}\text{C}$  NMR of **1(S)** (150 MHz,  $\text{CD}_3\text{OD}$ ).

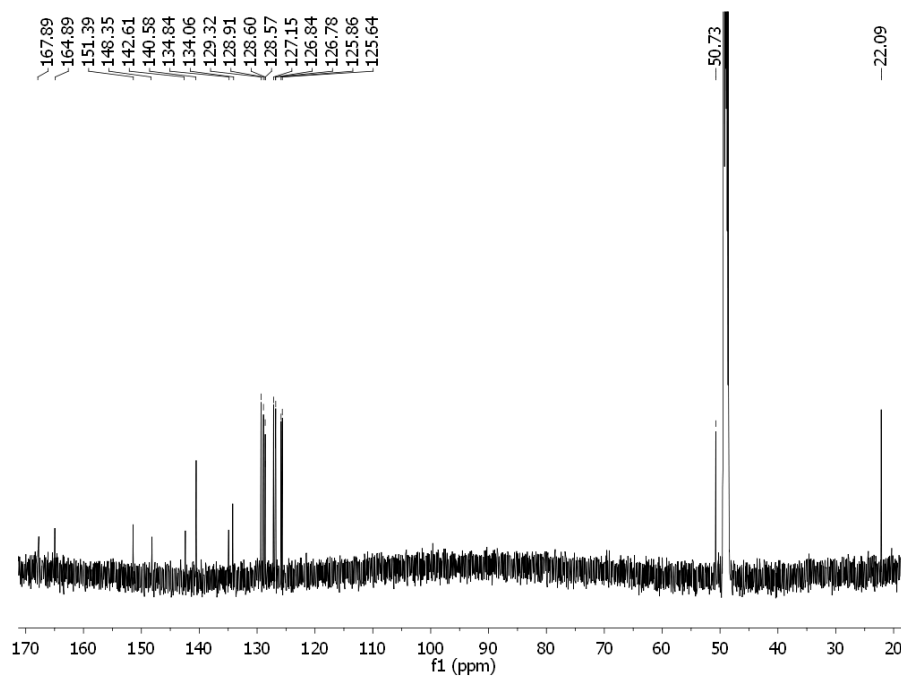

**Figure S10.**  $^1\text{H}$  NMR spectrum of  $\text{Eu}(\mathbf{1}(\mathbf{R}))_3$  (600 MHz,  $\text{CD}_3\text{CN}$ ): (A) full spectrum and (B) zoomed spectrum.

(A)

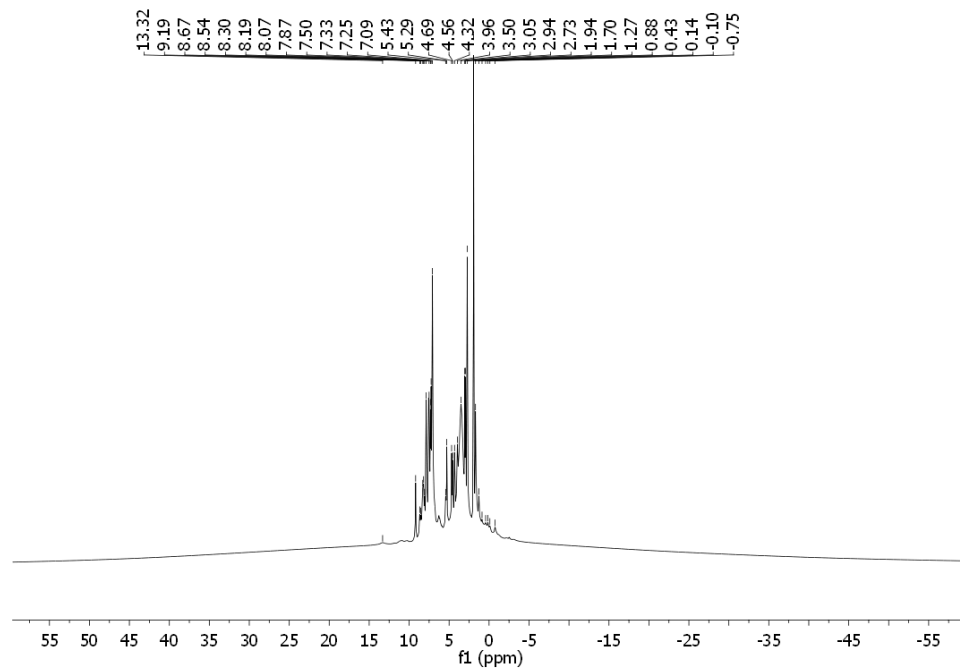

(B)

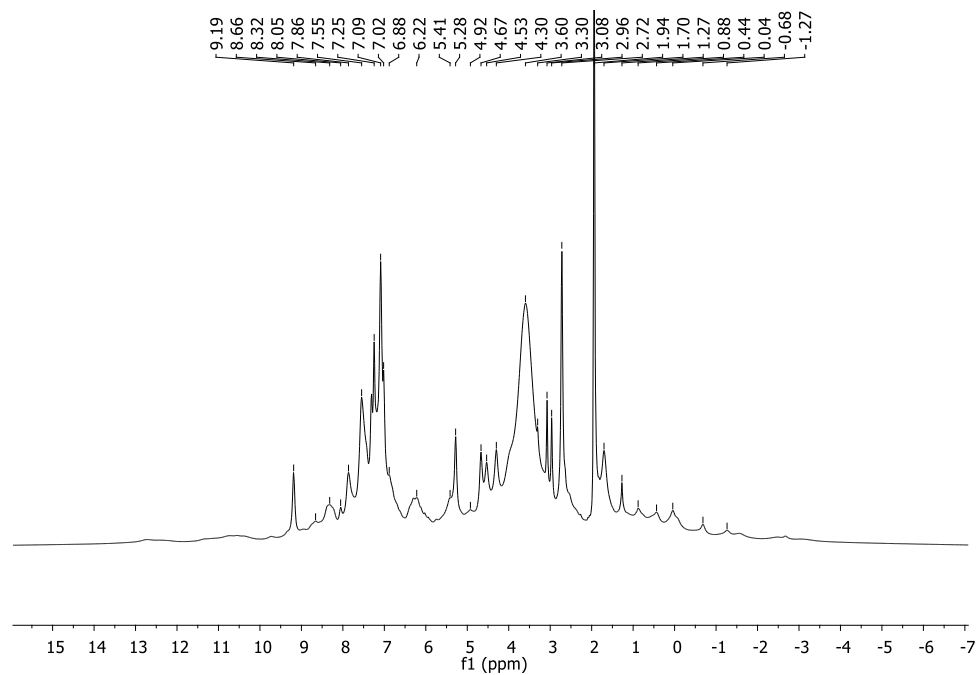

**Figure S11.**  $^1\text{H}$  NMR spectrum of  $\text{Eu}(\mathbf{1}(\mathbf{S}))_3$  (600 MHz,  $\text{CD}_3\text{CN}$ ).

**(A)**

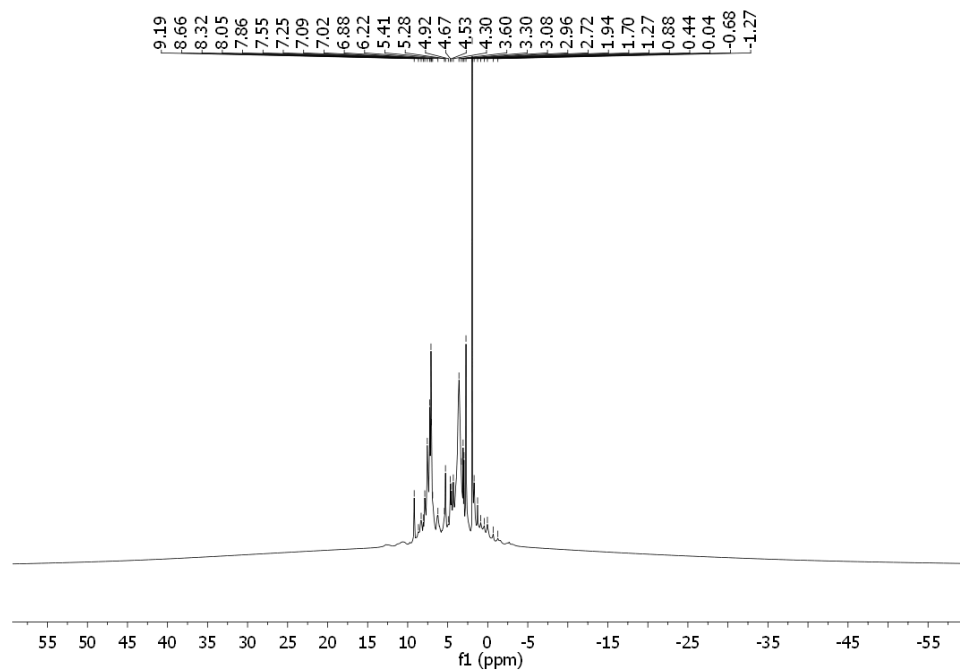

**(B)**

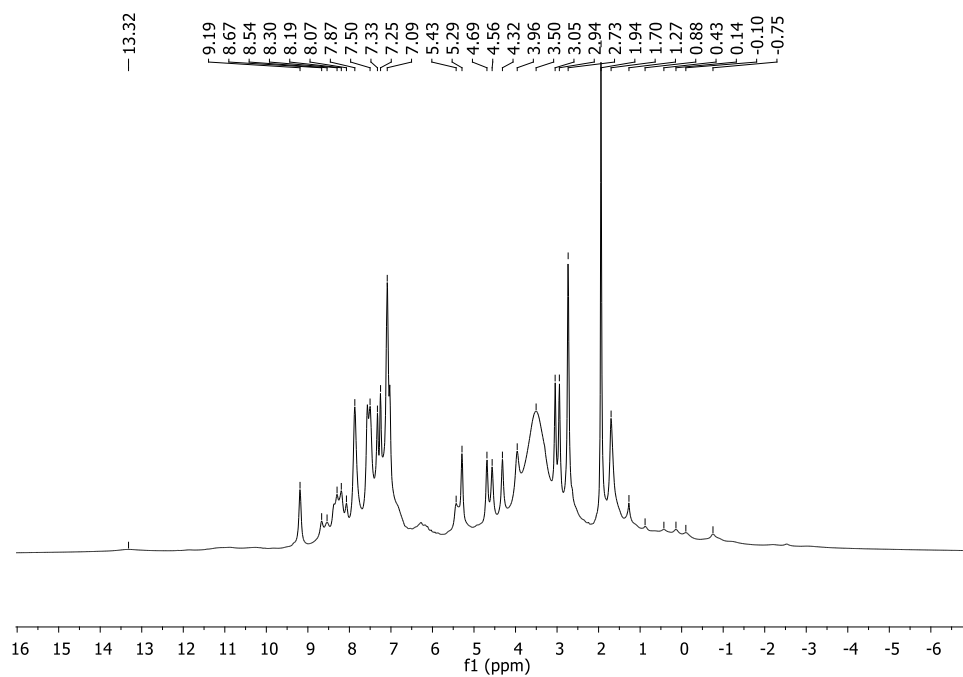

**Figure S12.** The calculated and experimental isotopic distribution patterns (MALDI-MS<sup>+</sup>) for (A) **Eu(1(S))<sub>3</sub>** and (B) **Eu(1(R))<sub>3</sub>**.

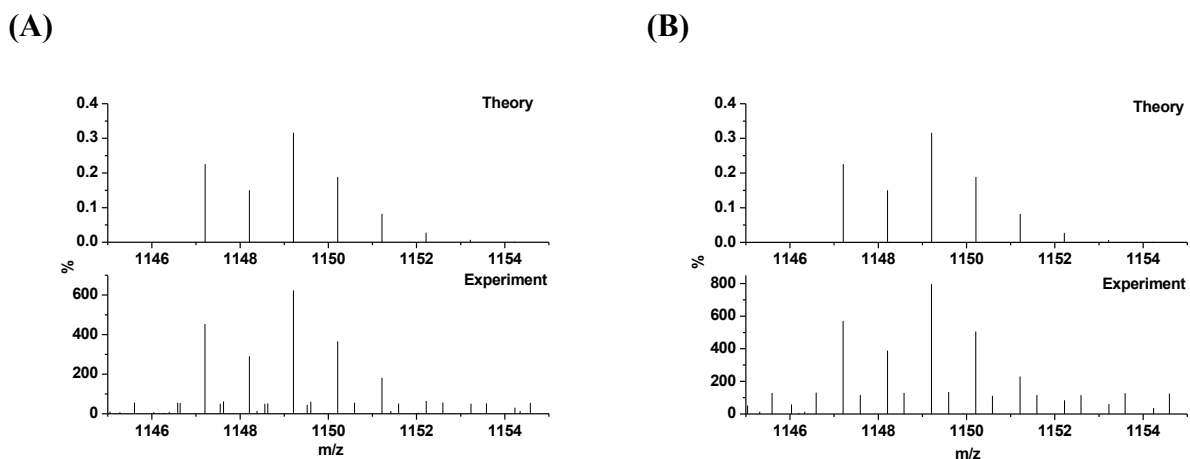

**Figure S13.** The changes in the absorption spectrum of (A) **1(S)** and (C) **1(R)** in CH<sub>3</sub>CN together with the corresponding linear fit of the changes at 270 nm (B) and (D) upon varying the concentration from  $2.5 \times 10^{-5}$  M to  $2.59 \times 10^{-6}$  M.

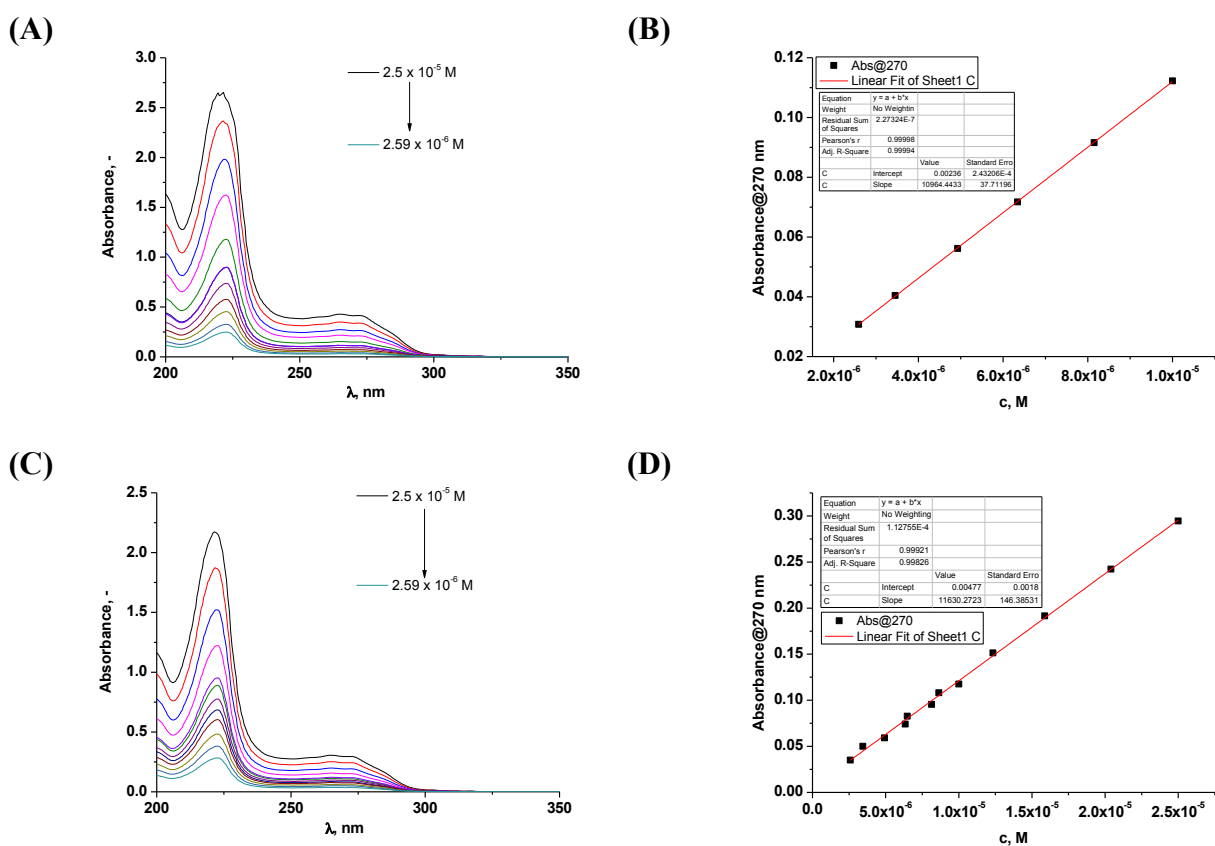



**Figure S14.** The absorption and fluorescence emission spectra of (A) **1(S)** (—) and **Eu(1(S))<sub>3</sub>** (---) in CH<sub>3</sub>CN ( $c(\mathbf{1(S)}) = 1 \times 10^{-5}$  M); (B) **1(R)** (—) and **Eu(1(R))<sub>3</sub>** (---) in CH<sub>3</sub>CN ( $c(\mathbf{1(R)}) = 1 \times 10^{-5}$  M).

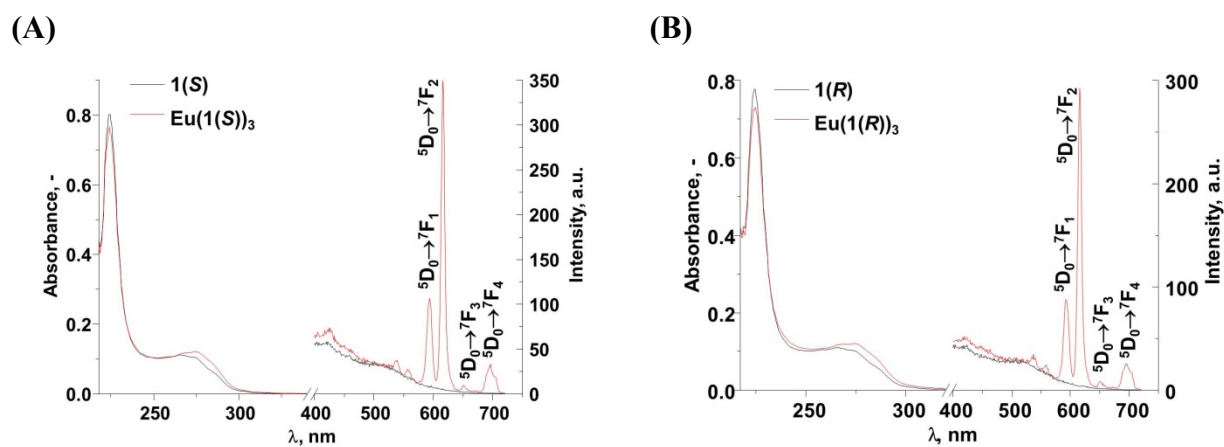

**Figure S15.** The absorption, excitation and fluorescence emission spectra of **Eu(1(S))<sub>3</sub>** ((A), (B)) and **Eu(1(R))<sub>3</sub>** ((C), (D)) in CH<sub>3</sub>CN ( $c = 2.72 \times 10^{-5}$  M) and CH<sub>3</sub>OH ( $c = 5.79 \times 10^{-5}$  M).

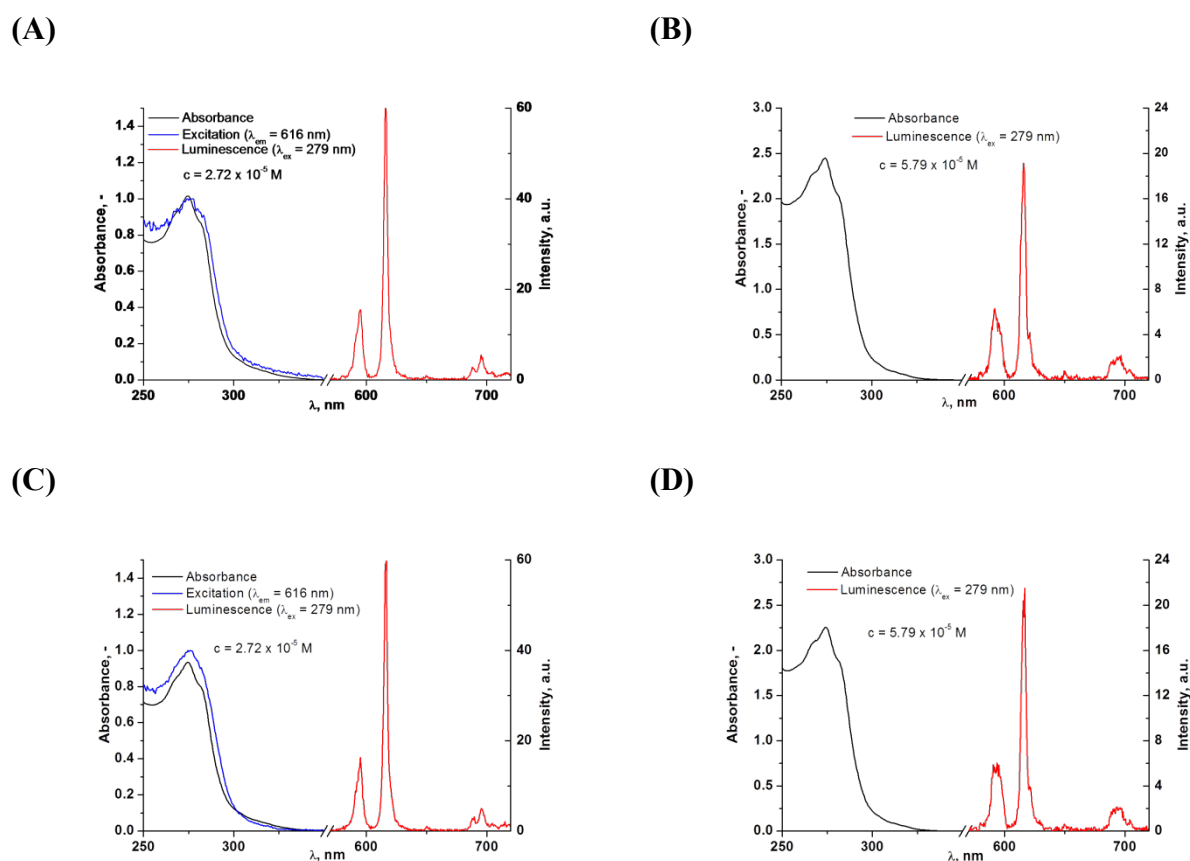

**Figure S16.** The changes in the (A) absorption, (B) fluorescence and (C) Eu(III)-centred emission spectra of **1(R)** ( $c = 1 \times 10^{-5}$  M) upon addition of  $\text{Eu}(\text{CF}_3\text{SO}_3)_3$  in  $\text{CH}_3\text{CN}$  (25 °C, 0.05 M  $(\text{C}_2\text{H}_5)_4\text{NCl}$ ).

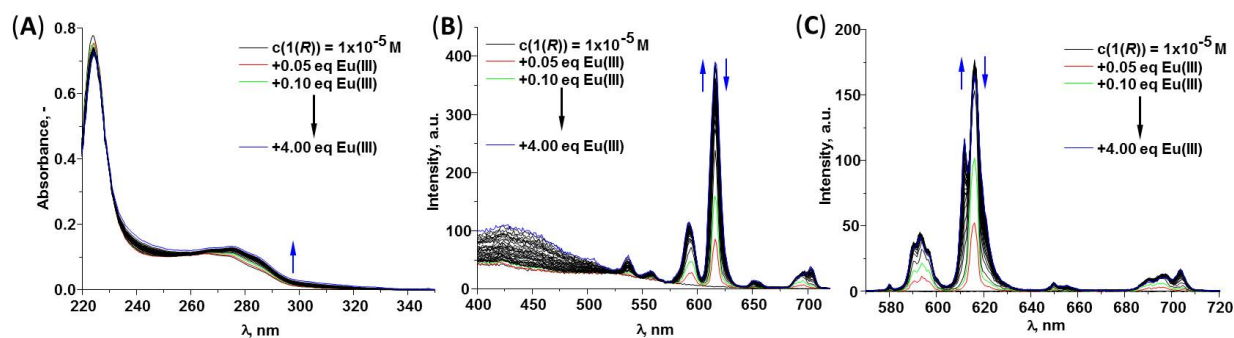

**Figure S17.** Experimental binding isotherms of the changes in the Eu(III)-centred emission spectrum of (A) **1(S)** and (B) **1(R)** ( $c = 1 \times 10^{-5}$  M) upon addition of  $\text{Eu}(\text{CF}_3\text{SO}_3)_3$  in  $\text{CH}_3\text{CN}$  (25 °C, 0.05 M  $(\text{C}_2\text{H}_5)_4\text{NCl}$ ).

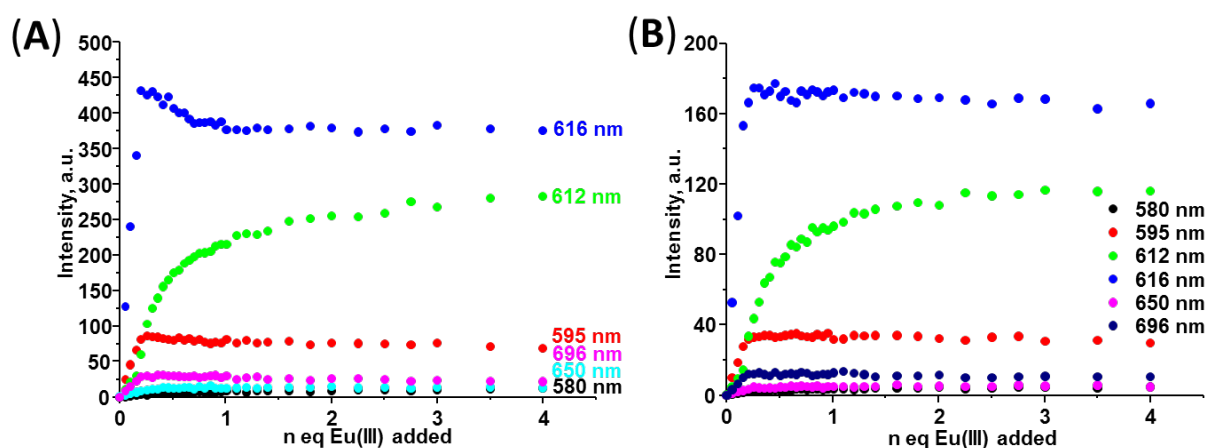

**Figure S18.** (A) Recalculated emission spectra, (B) experimental binding isotherms (•••) and their corresponding fit (–) by means of SPECFIT for the changes in the fluorescence spectra of **1(S)** ( $c = 1 \times 10^{-5}$  M) upon addition of  $\text{Eu}(\text{CF}_3\text{SO}_3)_3$  in  $\text{CH}_3\text{CN}$  (25 °C, 0.05 M  $(\text{C}_2\text{H}_5)_4\text{NCl}$ ).

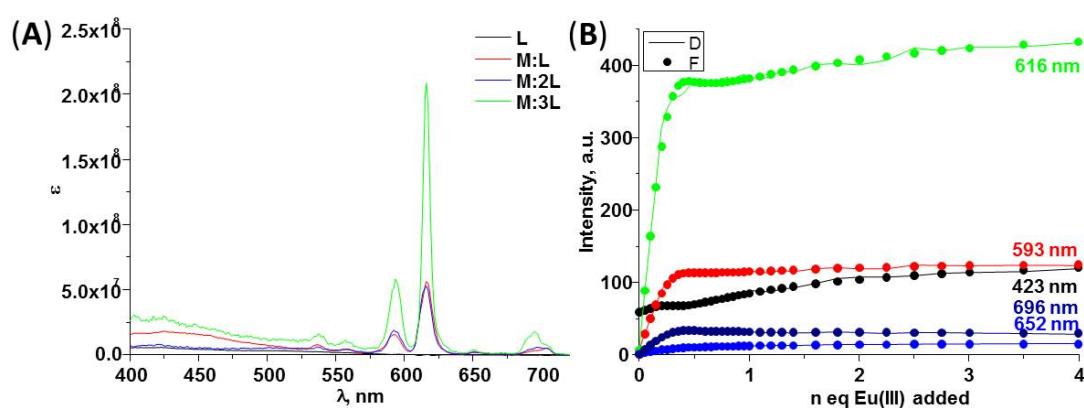

**Figure S19.** (A) Experimental binding isotherms and their corresponding fit obtained using non-linear regression analysis program SPECFIT, (B) speciation-distribution diagram obtained from the fit of the changes in the absorption spectrum of **1(R)** upon addition of  $\text{Eu}(\text{CF}_3\text{SO}_3)_3$  in  $\text{CH}_3\text{CN}$  (25 °C, 0.05 M  $(\text{C}_2\text{H}_5)_4\text{NCl}$ ).

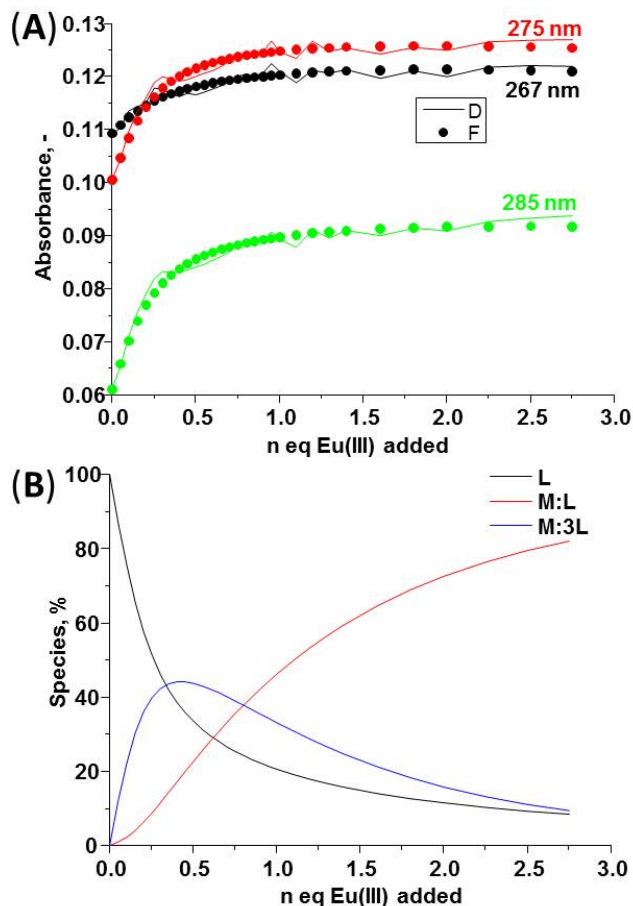

**Figure S20.** (A) Recalculated emission spectra, (B) experimental binding isotherms (•••) and their corresponding fit (–) by means of SPECFIT for the changes in the fluorescence spectra of **1(R)** ( $c = 1 \times 10^{-5}$  M) upon addition of  $\text{Eu}(\text{CF}_3\text{SO}_3)_3$  in  $\text{CH}_3\text{CN}$  (25 °C, 0.05 M  $(\text{C}_2\text{H}_5)_4\text{NCl}$ ).

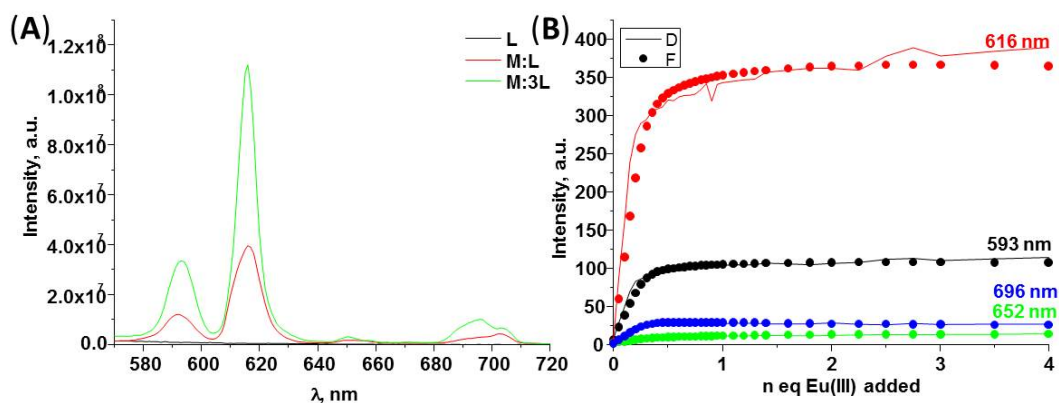

**Table S1.** Intermolecular hydrogen bond distances (Å) and angles (°) for **1(R)** and **1(S)**.

| D-H...A                                                    | Donor-Acceptor                               |                          | Angle |      |
|------------------------------------------------------------|----------------------------------------------|--------------------------|-------|------|
|                                                            | 1(R)                                         | 1(S)                     | 1(R)  | 1(S) |
| O2-H2...O11 <sup>#2</sup>                                  | 2.5709(17)                                   | 2.5740(14)               | 160   | 159  |
| C7-H7A...O1 <sup>#1</sup>                                  | 3.467(2)                                     | 3.4744(17)               | 174   | 174  |
| C14-H14A...O26                                             | 3.249(2) <sup>#3</sup>                       | 3.2426(17) <sup>#1</sup> | 129   | 129  |
| O26-H26...O35 <sup>#2</sup>                                | 2.5889(16)                                   | 2.5915(14)               | 156   | 156  |
| C31-H31A...O25 <sup>#1</sup>                               | 3.479(2)                                     | 3.4876(17)               | 172   | 172  |
| Symmetry Transformations used to generate equivalent atoms | #1 = x,y,z+1<br>#2 = x,y,z-1<br>#3 x+1,y,z+1 |                          |       |      |

**Table S2.** Intermolecular hydrogen bond distances (Å) and angles (°) for **Eu(1(R))<sub>3</sub>**.

| D-H...A                                                                                                                                                                                  | Donor-Acceptor | Angle      |
|------------------------------------------------------------------------------------------------------------------------------------------------------------------------------------------|----------------|------------|
| N2—H2...O16 <sup>#1</sup>                                                                                                                                                                | 3.031(14)      | 172.0      |
| N4—H4A...O23                                                                                                                                                                             | 2.88(3)        | 155.1      |
| N6—H6...O10 <sup>#2</sup>                                                                                                                                                                | 3.140(12)      | 152.0      |
| N8—H8...O20                                                                                                                                                                              | 2.78(2)        | 155.3      |
| N10—H10...O19                                                                                                                                                                            | 2.981(17)      | 161.0      |
| N12—H12...O1 <sup>#2</sup>                                                                                                                                                               | 2.83(2)        | 164.8      |
| O19—H19A...O5                                                                                                                                                                            | 2.78(2)        | 178.2 (13) |
| O19—H19B...O17 <sup>#1</sup>                                                                                                                                                             | 2.98(2)        | 178.6 (13) |
| O20—H20A...O8 <sup>#3</sup>                                                                                                                                                              | 2.80(2)        | 177.4 (14) |
| O22—H22A...O8 <sup>#4</sup>                                                                                                                                                              | 4.00(6)        | 167 (4)    |
| O23—H23A...O2 <sup>#5</sup>                                                                                                                                                              | 2.64(3)        | 178 (2)    |
| O23—H23B...O24                                                                                                                                                                           | 2.80(3)        | 177 (2)    |
| O24—H24A...O13 <sup>vi</sup>                                                                                                                                                             | 2.93(2)        | 125.6 (15) |
| O24—H24B...O14 <sup>vi</sup>                                                                                                                                                             | 2.87(3)        | 111.3 (15) |
| Symmetry codes: (i) $x-1/2, -y+1/2, -z+1$ ; (ii) $-x+1, y, -z+3/2$ ; (iii) $x+1/2, -y+1/2, -z+1$ ; (iv) $-x+1/2, -y+1/2, z-1/2$ ; (v) $-x+1/2, y+1/2, -z+3/2$ ; (vi) $x-1/2, y+1/2, z$ . |                |            |

**Table S3.** Selected coordination bond distances (Å) and angles (°) for **Eu(1(R))<sub>3</sub>**.

|        |            |         |            |
|--------|------------|---------|------------|
| Eu1—O1 | 2.389 (14) | O10—Eu2 | 2.336 (14) |
| Eu1—O3 | 2.432 (12) | O12—Eu2 | 2.468 (14) |
| Eu1—O4 | 2.294 (15) | O13—Eu2 | 2.421 (14) |
| Eu1—O6 | 2.415 (15) | O15—Eu2 | 2.392 (14) |
| Eu1—O7 | 2.423 (6)  | O16—Eu2 | 2.352 (15) |
| Eu1—O9 | 2.469 (12) | O18—Eu2 | 2.433 (11) |
| Eu1—N1 | 2.542 (15) | N7—Eu2  | 2.581 (15) |
| Eu1—N3 | 2.564 (18) | N9—Eu2  | 2.558 (19) |
| Eu1—N5 | 2.596 (17) | N11—Eu2 | 2.513 (17) |

|           |           |             |           |
|-----------|-----------|-------------|-----------|
| O4—Eu1—N1 | 68.1 (5)  | O10—Eu2—N11 | 73.3 (5)  |
| O1—Eu1—N1 | 65.4 (5)  | O16—Eu2—N11 | 63.1 (5)  |
| O6—Eu1—N1 | 141.3 (6) | O15—Eu2—N11 | 138.8 (5) |
| O7—Eu1—N1 | 74.6 (4)  | O13—Eu2—N11 | 71.6 (5)  |
| O3—Eu1—N1 | 63.7 (5)  | O18—Eu2—N11 | 63.5 (5)  |
| O9—Eu1—N1 | 139.0 (5) | O12—Eu2—N11 | 136.9 (5) |

|           |           |            |           |
|-----------|-----------|------------|-----------|
| O4—Eu1—N3 | 64.2 (7)  | O10—Eu2—N9 | 135.0 (6) |
| O1—Eu1—N3 | 137.3 (6) | O16—Eu2—N9 | 136.4 (6) |
| O6—Eu1—N3 | 63.3 (6)  | O15—Eu2—N9 | 62.5 (6)  |
| O7—Eu1—N3 | 138.3 (5) | O13—Eu2—N9 | 64.0 (7)  |
| O3—Eu1—N3 | 72.1 (5)  | O18—Eu2—N9 | 75.6 (5)  |
| O9—Eu1—N3 | 73.3 (4)  | O12—Eu2—N9 | 74.1 (5)  |
| N1—Eu1—N3 | 117.6 (6) | N11—Eu2—N9 | 123.4 (6) |
| O4—Eu1—N5 | 141.5 (6) | O10—Eu2—N7 | 63.6 (5)  |
| O1—Eu1—N5 | 72.6 (5)  | O16—Eu2—N7 | 77.0 (5)  |
| O6—Eu1—N5 | 70.8 (5)  | O15—Eu2—N7 | 68.5 (5)  |
| O7—Eu1—N5 | 62.2 (5)  | O13—Eu2—N7 | 144.8 (5) |
| O3—Eu1—N5 | 136.0 (7) | O18—Eu2—N7 | 135.0 (5) |
| O9—Eu1—N5 | 63.2 (6)  | O12—Eu2—N7 | 61.4 (5)  |
| N1—Eu1—N5 | 121.6 (6) | N11—Eu2—N7 | 121.0 (5) |
| N3—Eu1—N5 | 120.9 (6) | N9—Eu2—N7  | 115.6 (6) |

**Figure S21.** (A) Changes in CD spectra of **1(R)** (–) ( $c = 1 \times 10^{-5}$  M, 25 °C) upon addition of  $\text{Eu}(\text{CF}_3\text{SO}_3)_3$  and (B) experimental binding isotherms representing the changes in the CD bands of **1(R)** (closed circles) and **1(S)** (open circles) upon gradual  $\text{Eu}(\text{CF}_3\text{SO}_3)_3$  addition in  $\text{CH}_3\text{CN}$ .

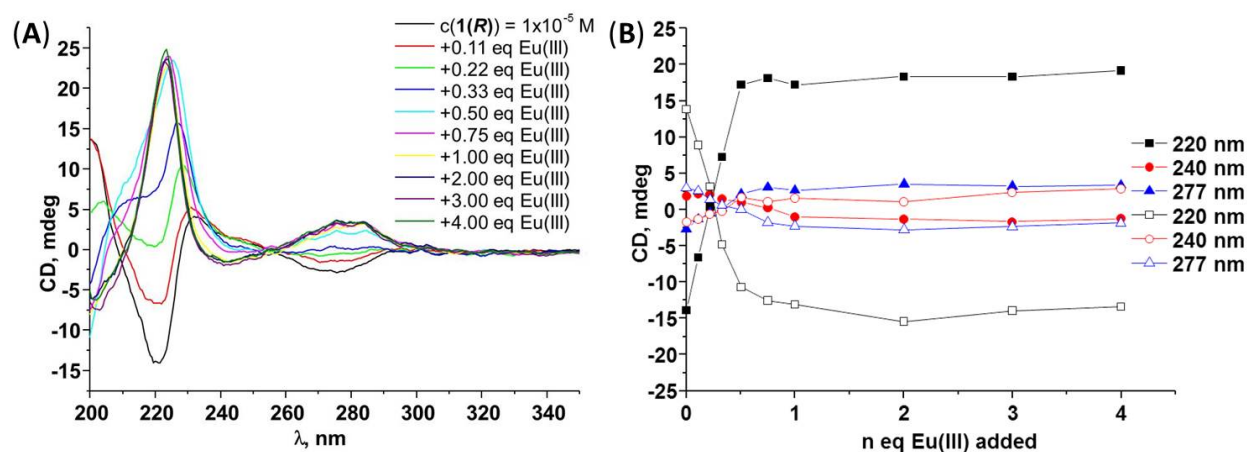

**Figure S22.** Changes in CD spectra of **1(S)** (–) ( $c = 1 \times 10^{-5}$  M, 25 °C) upon addition of  $\text{Eu}(\text{CF}_3\text{SO}_3)_3$  in  $\text{CH}_3\text{CN}$ .

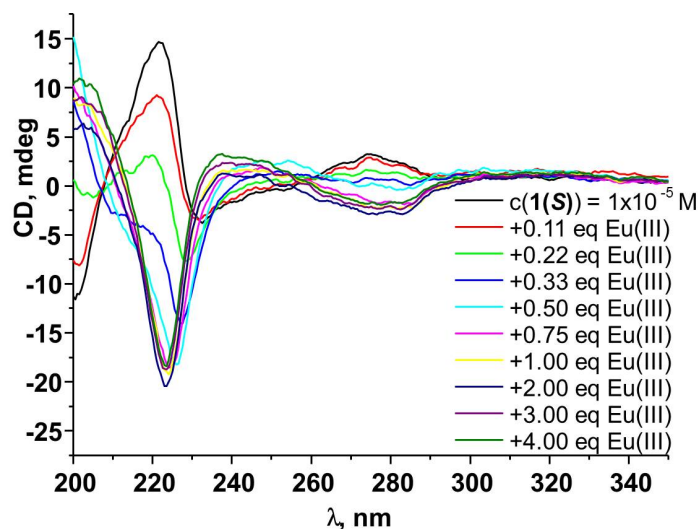

**Figure 23.** (A) Changes in CD spectra of **1(R)** (–) ( $c = 1 \times 10^{-5}$  M, 25 °C) upon addition of  $\text{Eu}(\text{CF}_3\text{SO}_3)_3$  and (B) experimental binding isotherms representing the changes in the CD bands upon gradual  $\text{Eu}(\text{CF}_3\text{SO}_3)_3$  addition in  $\text{CH}_3\text{CN}$  ( $(\text{C}_2\text{H}_5)_4\text{NCl}$ , 0.05 M).

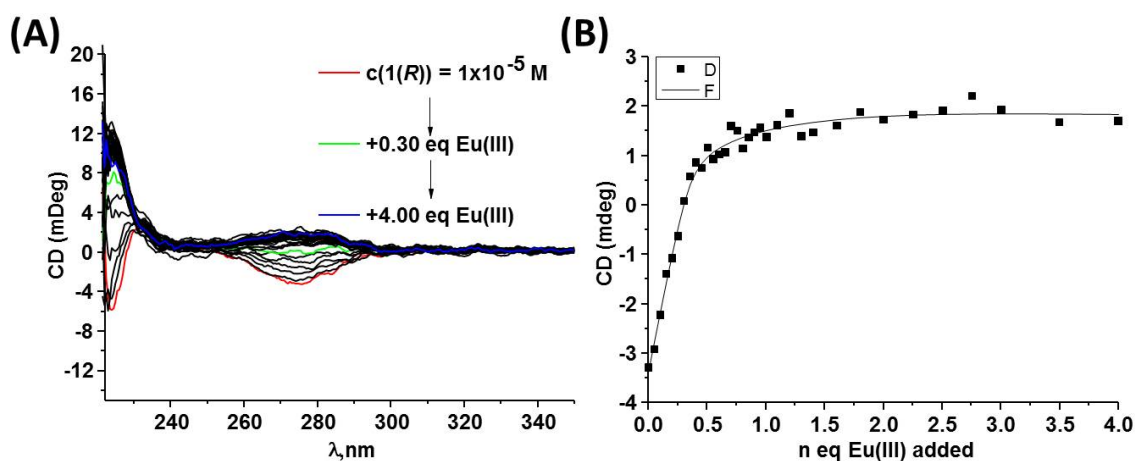

**Table S4.** Summary of CPL results for  $\text{Eu}(\mathbf{1(S)})_3$  and  $\text{Eu}(\mathbf{1(R)})_3$  in methanol at 25 °C.

| Electronic transition                     | Wavelength/nm | $g_{lum}$                    |                              |
|-------------------------------------------|---------------|------------------------------|------------------------------|
|                                           |               | $\text{Eu}(\mathbf{1(S)})_3$ | $\text{Eu}(\mathbf{1(R)})_3$ |
| $^5\text{D}_0 \rightarrow ^7\text{F}_1$   | 589           | 0.16                         | -0.15                        |
| $^5\text{D}_0 \rightarrow ^7\text{F}_1$   | 592           | 0.19                         | -0.17                        |
| $^5\text{D}_0 \rightarrow ^7\text{F}_2$   | 614           | -0.09                        | 0.10                         |
| $^5\text{D}_0 \rightarrow ^7\text{F}_3^*$ | 650           | 0.25                         | -0.14                        |
| $^5\text{D}_0 \rightarrow ^7\text{F}_4$   | 693           | -0.05                        | 0.05                         |
| $^5\text{D}_0 \rightarrow ^7\text{F}_4^*$ | 703           | 0.24                         | -0.17                        |

\* – relatively significant difference for the  $g_{lum}$  values between two enantiomers in the case of  $^5\text{D}_0 \rightarrow ^7\text{F}_3$  and  $^5\text{D}_0 \rightarrow ^7\text{F}_4$  transitions is most likely due to the noise as both of these are possessing very low in intensity

Figure S24.  $^1\text{H}$  NMR spectrum of **1(S)** ( $c = 4.26 \times 10^{-4}$  M;  $\text{CD}_3\text{CN}$ , 600 MHz).

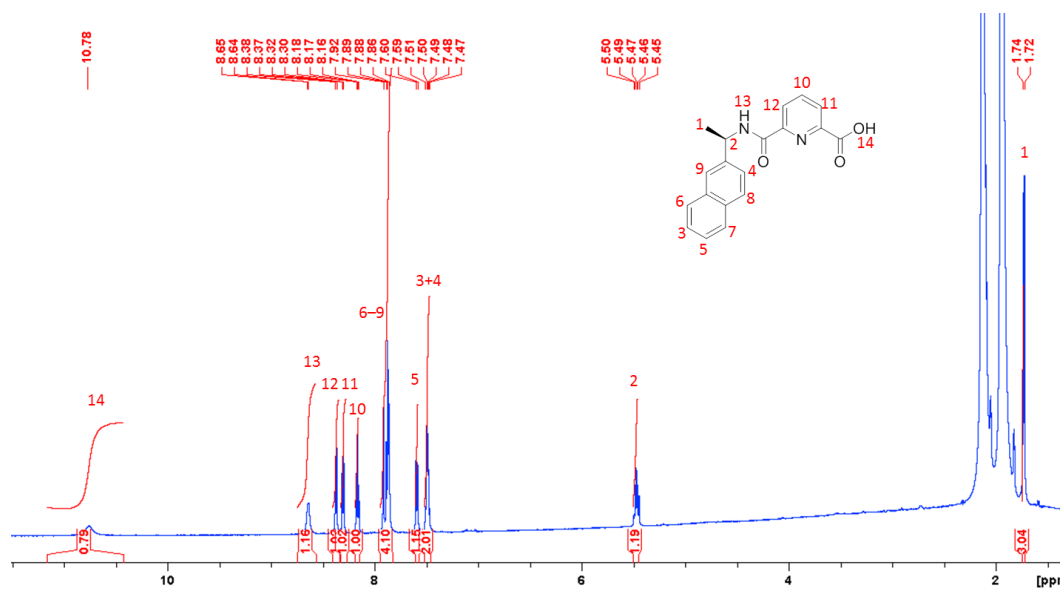

Figure S25.  $^{13}\text{C}$  NMR spectrum of **1(S)** ( $c = 4.26 \times 10^{-4}$  M;  $\text{CD}_3\text{CN}$ , 600 MHz).

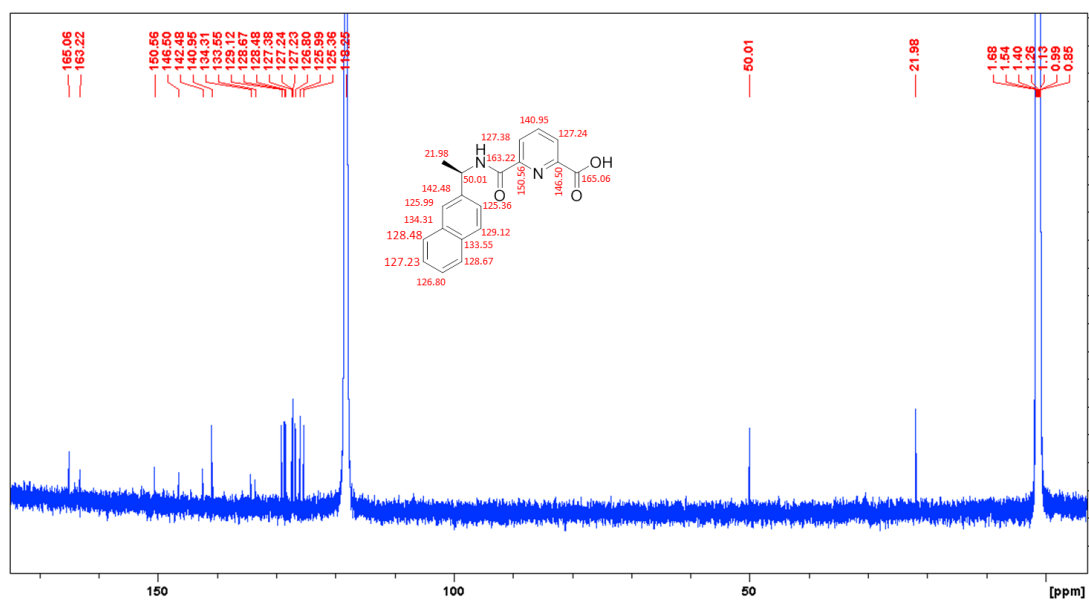

**Figure S26.** 2D TOCSY spin network for **1(S)** ( $c = 4.26 \times 10^{-4}$  M;  $\text{CD}_3\text{CN}$ , 600 MHz).

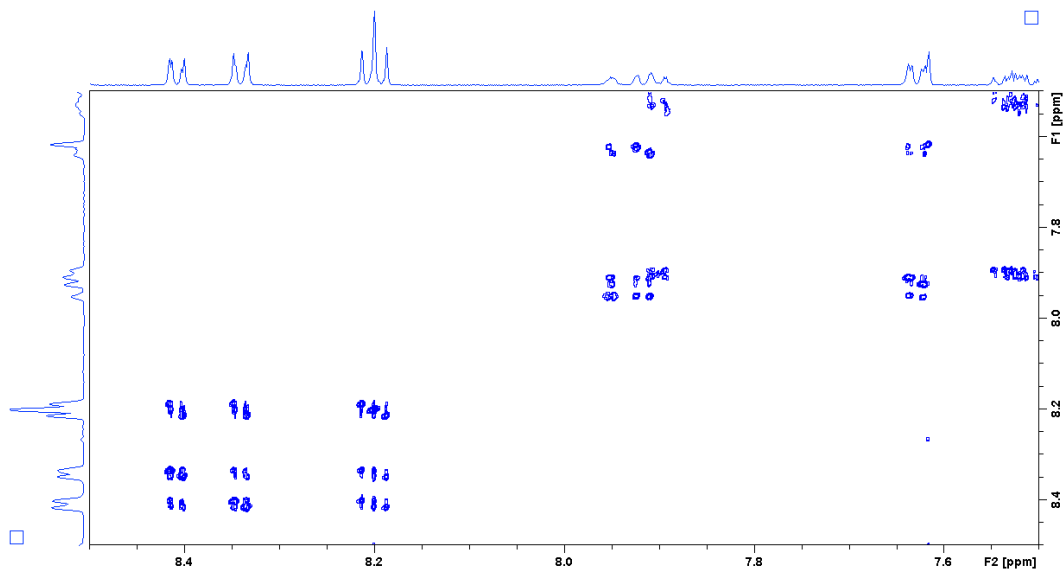

**Figure S27.** The changes in the <sup>1</sup>H NMR spectra of **1(R)** ( $c = 4.26 \times 10^{-4}$  M) upon gradual addition of  $\text{La}(\text{CF}_3\text{SO}_3)_3$  in  $\text{CD}_3\text{CN}$ .

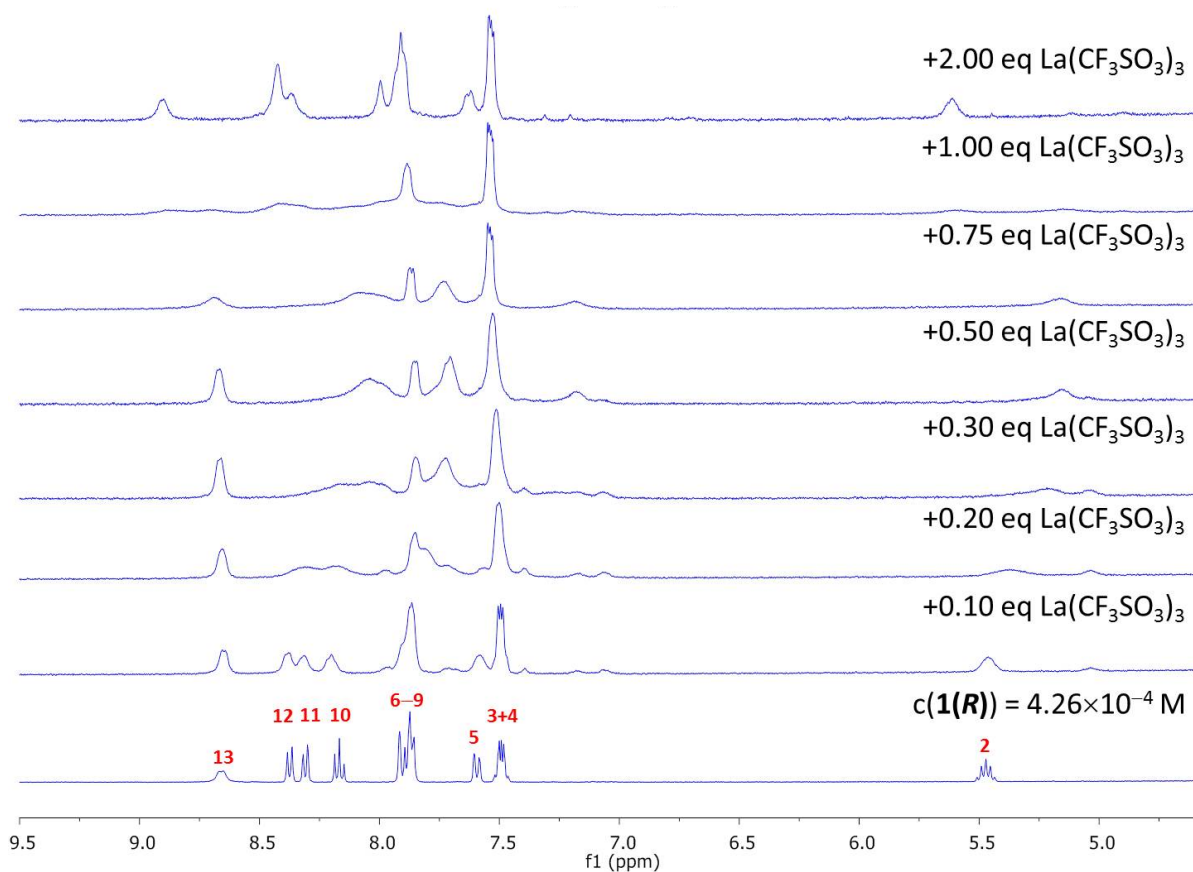



**Figure S28.** CD spectra of  $\text{EuL}_3$  ( $L = 1(S), 1(R)$ ;  $c = 1 \times 10^{-5}$  M) recorded in  $\text{CH}_3\text{CN}$  at various temperatures: (A) and (C) represent full spectrum range while (B) and (D) zoomed areas.

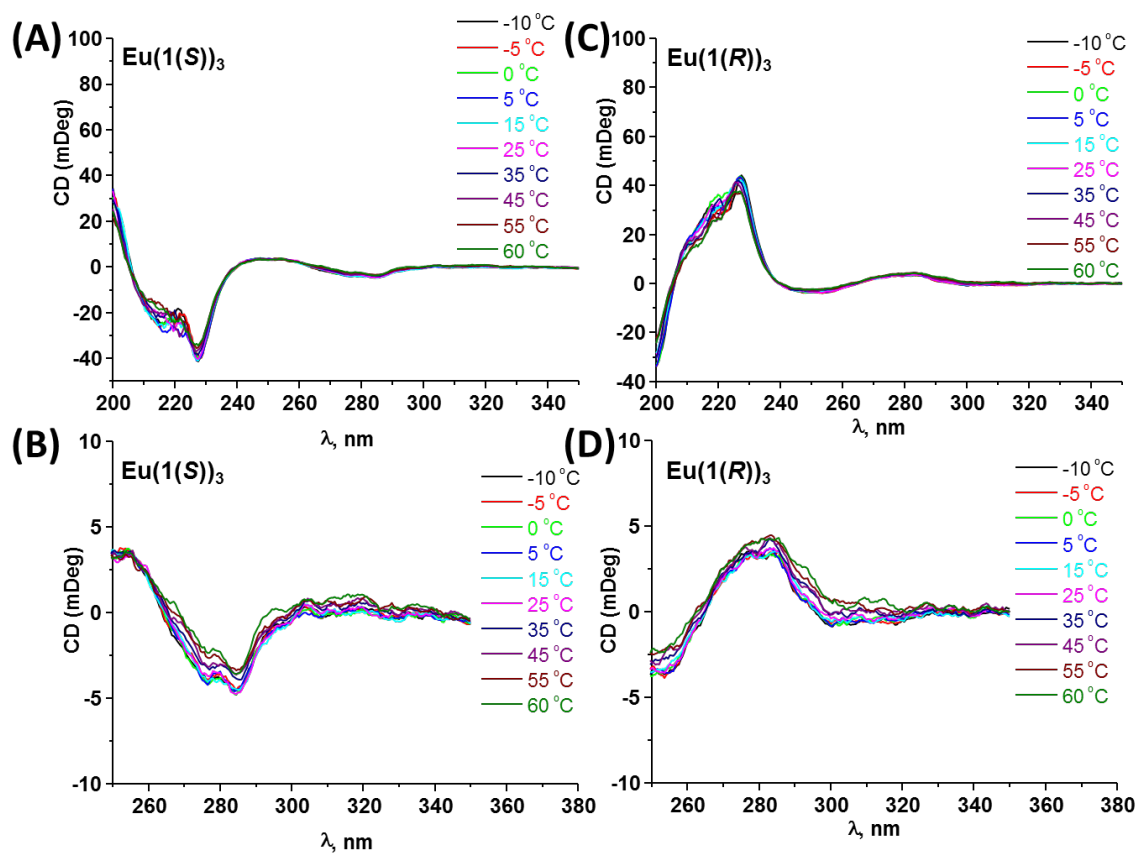

**Figure S29.** The changes in the main CD bands of  $\text{EuL}_3$  ( $L = 1(S), 1(R)$ ;  $c = 1 \times 10^{-5}$  M) in  $\text{CH}_3\text{CN}$  versus temperature of the solution.

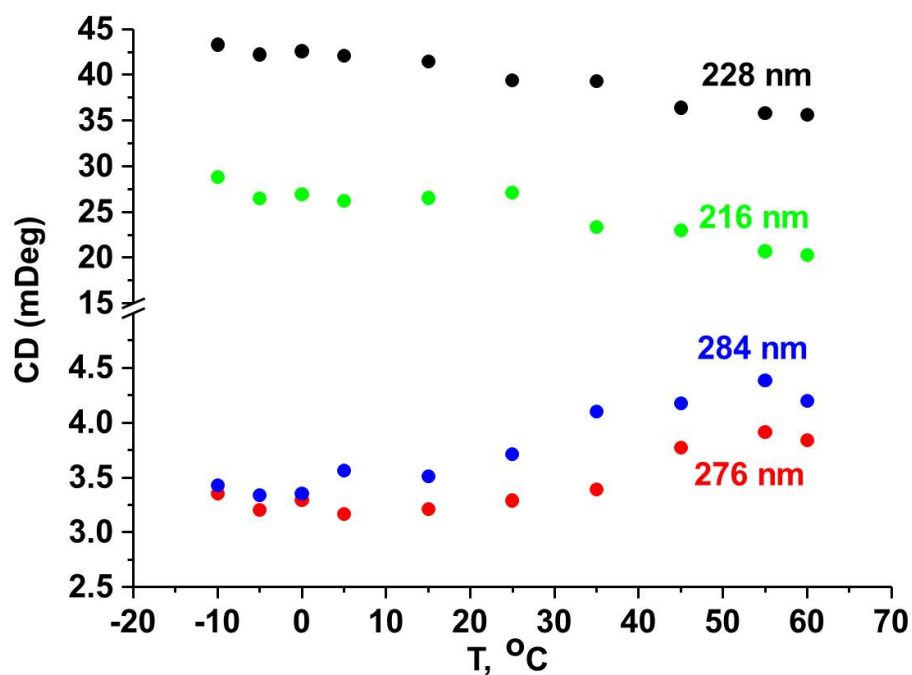

**Figure S30.** Space filling representation of  $\text{Eu}(\mathbf{1}(\mathbf{R}))_3$  complex. Only fragment 1 is shown for clarity.

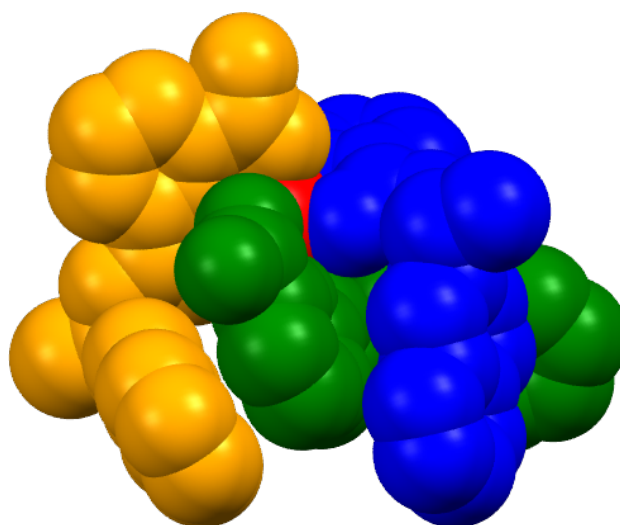

**Figure S31.** Intramolecular  $\pi$ - $\pi$  interactions between pyridine and 2-naphthyl moieties within  $\text{Eu}(\mathbf{1}(\mathbf{R}))_3$ .

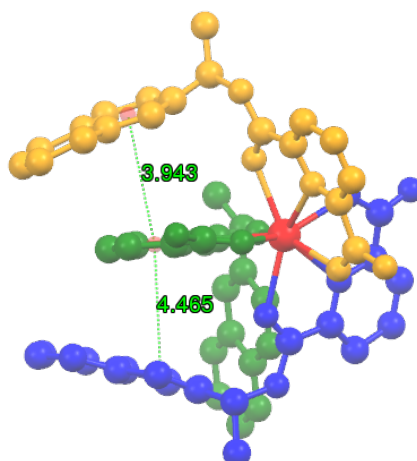

Supplement: SC-006-C4SC02474E-s001.pdf [file SC-006-C4SC02474E-s001.pdf]
